# Supplementary material
Source: publisher figshare collection journal article supplement (https://acs.figshare.com/ndownloader/files/4589668)
Supplement: Supplementary file 1 [file 4589668]

## Supplementary Information

### Template-free Formation of Meso-structured Anatase TiO<sub>2</sub> with Spherical Morphology<sup>\*\*</sup>

*Poovathinthodiyil Raveendran<sup>†\*</sup>, Muthusamy Eswaramoorthy,<sup>‡\*</sup> Bindu Unnikrishnan,<sup>†</sup>*

*Maya Chatterjee,<sup>¶</sup> Yukiya Hakuta,<sup>¶</sup> Hajime Kawanami<sup>¶</sup> and Fujio Mizukami<sup>¶</sup>*

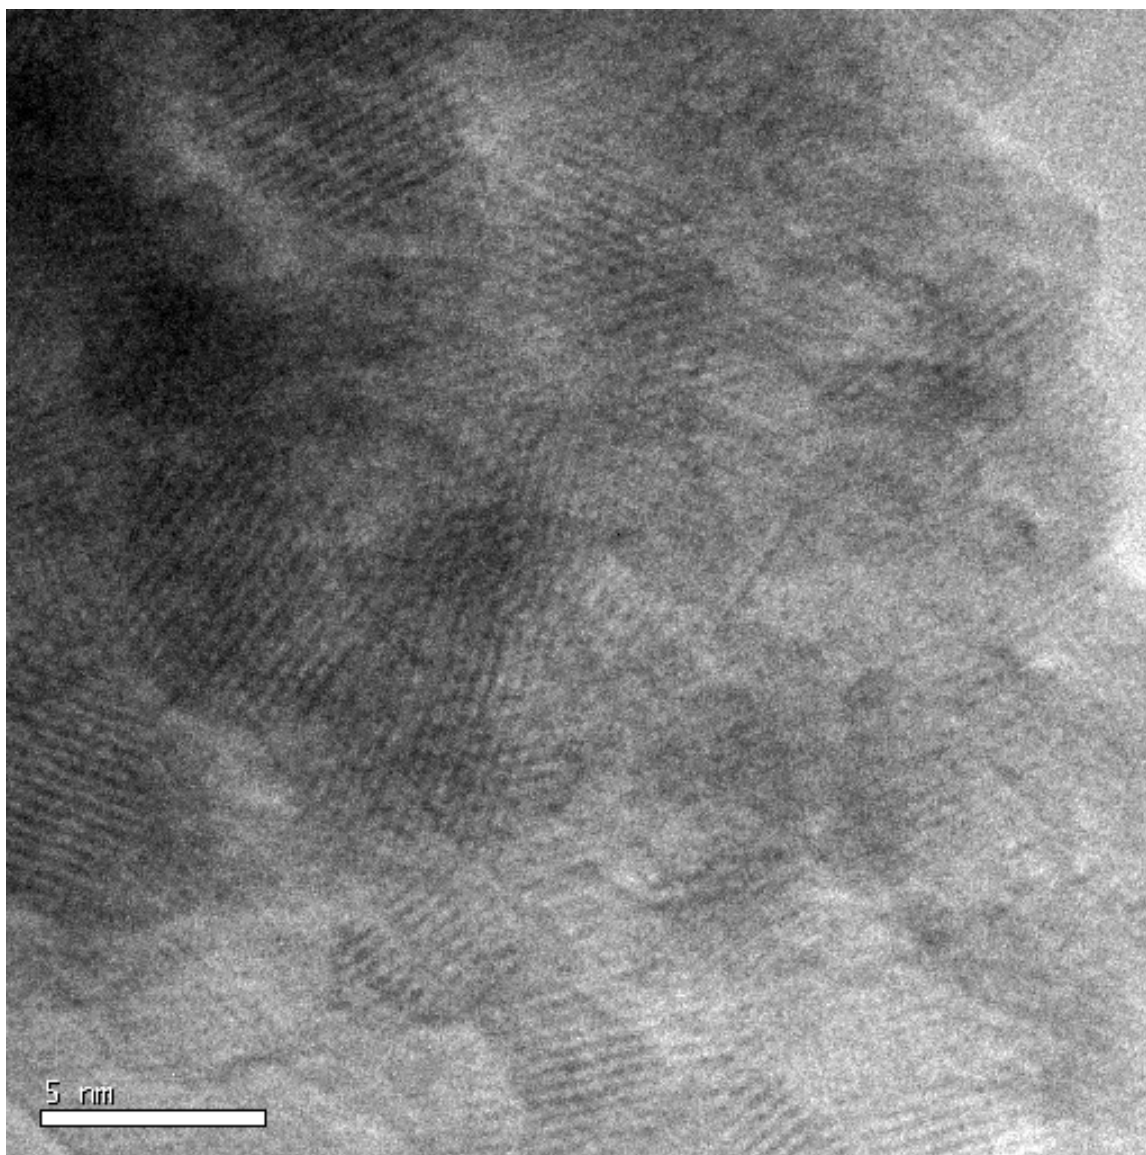

**Figure S1.** HR TEM image of the mesoporous anatase TiO<sub>2</sub> sample prepared by hydrolytic condensation of TiOB/EA, after calcinations at 400 °C.
